# Supplementary material
Source: PubMed Central journal article supplement (PMC6935750)
Supplement: awz363_supplementary_data.pdf [file awz363_supplementary_data.pdf]

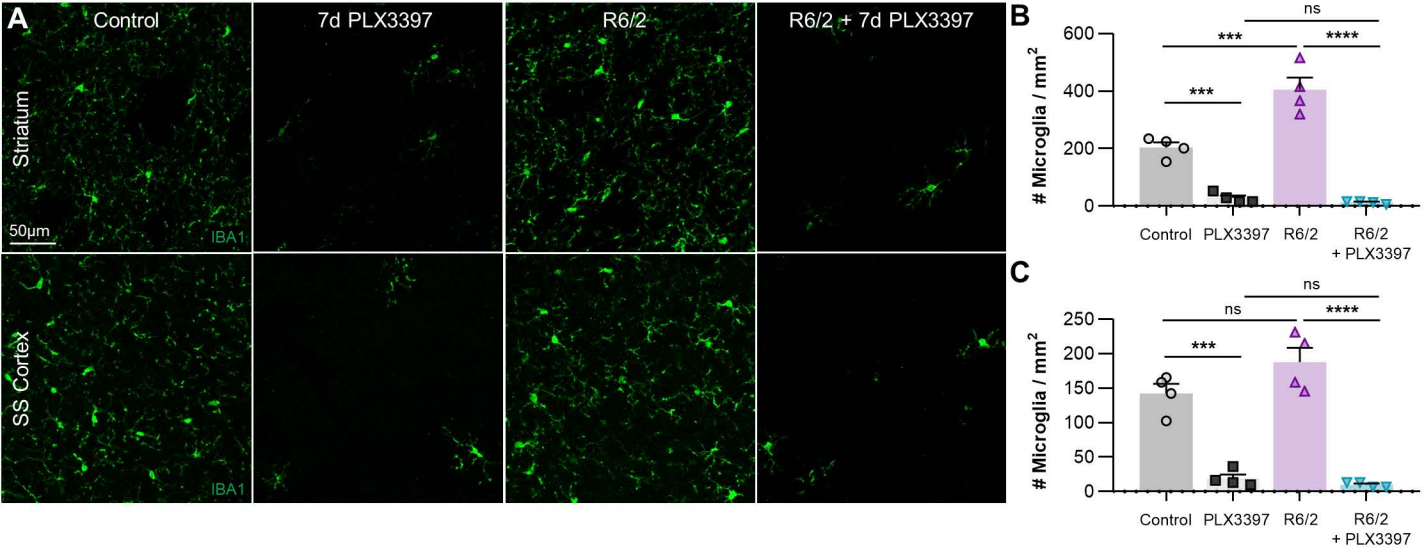

**Supplementary Figure 1: 7 days of 275mg/kg PLX3397 significantly reduces elevated IBA1<sup>+</sup> microglia numbers in 6-week-old R6/2 mice.** **A.** Representative 20X images of striatal/cortical IBA1<sup>+</sup> microglia from 6-week-old R6/2 or nontransgenic mice treated with vehicle or 275mg/kg PLX3397 for 7 days. **B-C.** Quantification of microglia revealed significantly increased densities in the R6/2 striatum at 7 weeks ( $p < 0.001$ ) and confirm significant and comparable depletion with 7d 275 mg/kg PLX3397 compared to vehicle-treated controls in R6/2 ( $p < 0.0001$ ,  $p < 0.0001$ ) and NT ( $p < 0.001$ ,  $p < 0.001$ ) striatum/somatosensory cortex (two-way ANOVA with Tukey's post-hoc test;  $n = 4/\text{group}$ ). Statistical significance is denoted by \*  $p < 0.05$ , \*\*  $p < 0.01$ , \*\*\*  $p < 0.001$ , \*\*\*\*  $p < 0.0001$ . Error bars indicate SEM.

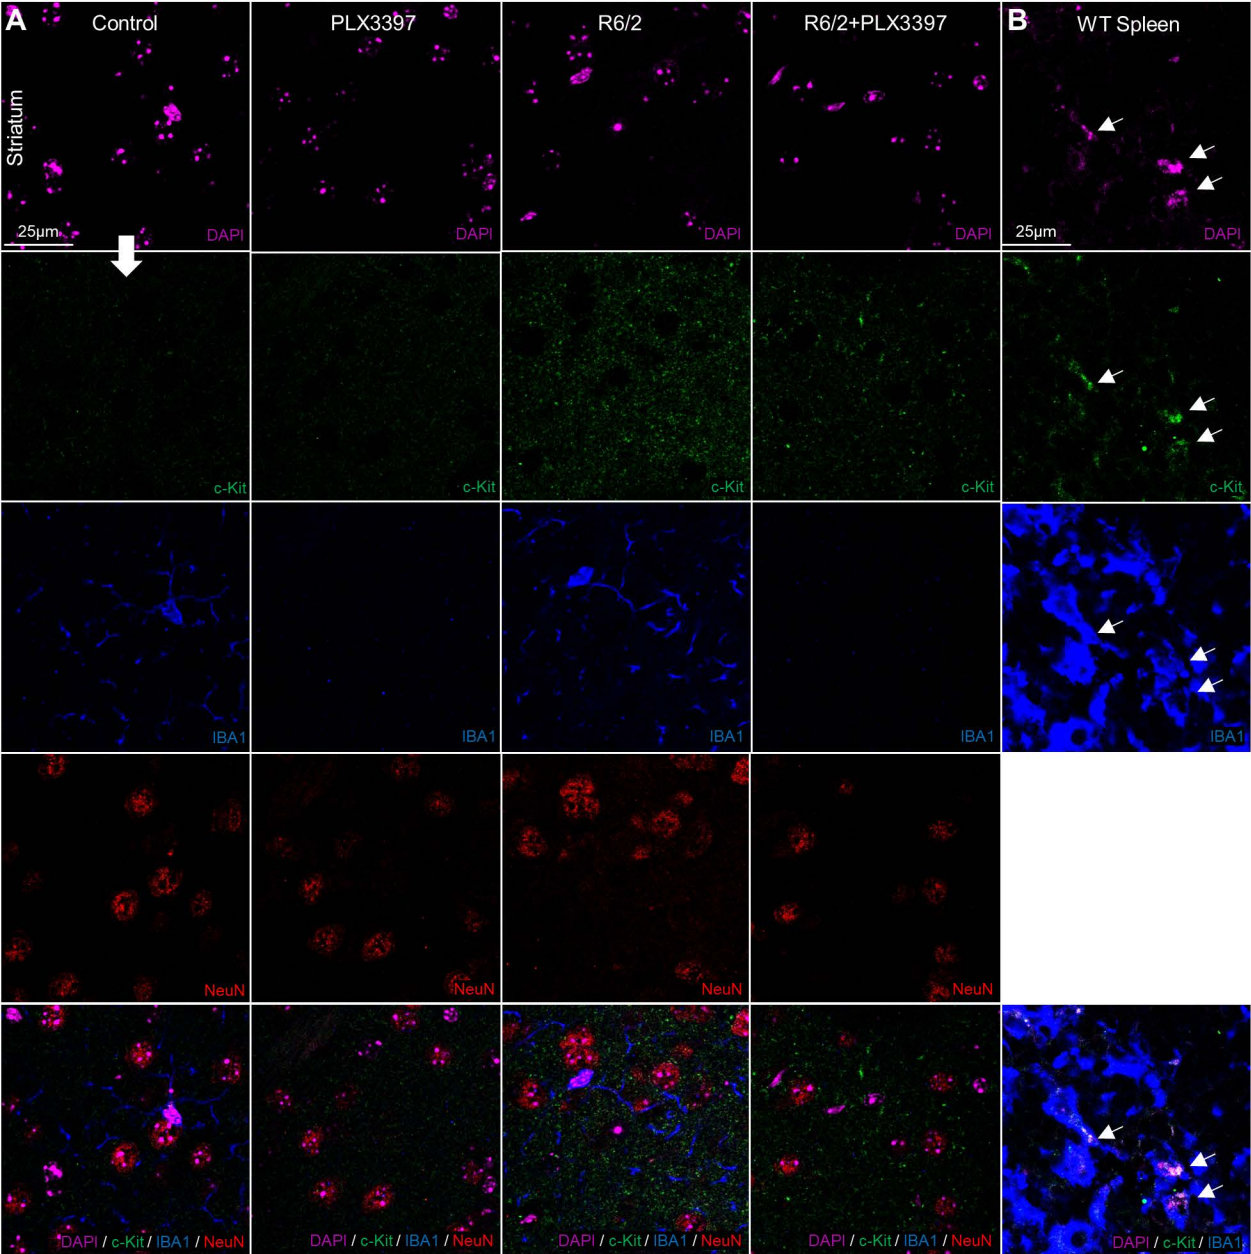

**Supplementary Figure 2: c-Kit is not expressed by neurons or microglia in R6/2 or nontransgenic brains.** **A.** Representative 63X images confirming absence of neuronal or microglial c-Kit expression in vehicle- or PLX3397-treated R6/2 or nontransgenic striatum at 11 weeks. **B.** Representative 63X image of c-Kit<sup>+</sup>IBA1<sup>+</sup> cells in adult wild-type spleen.

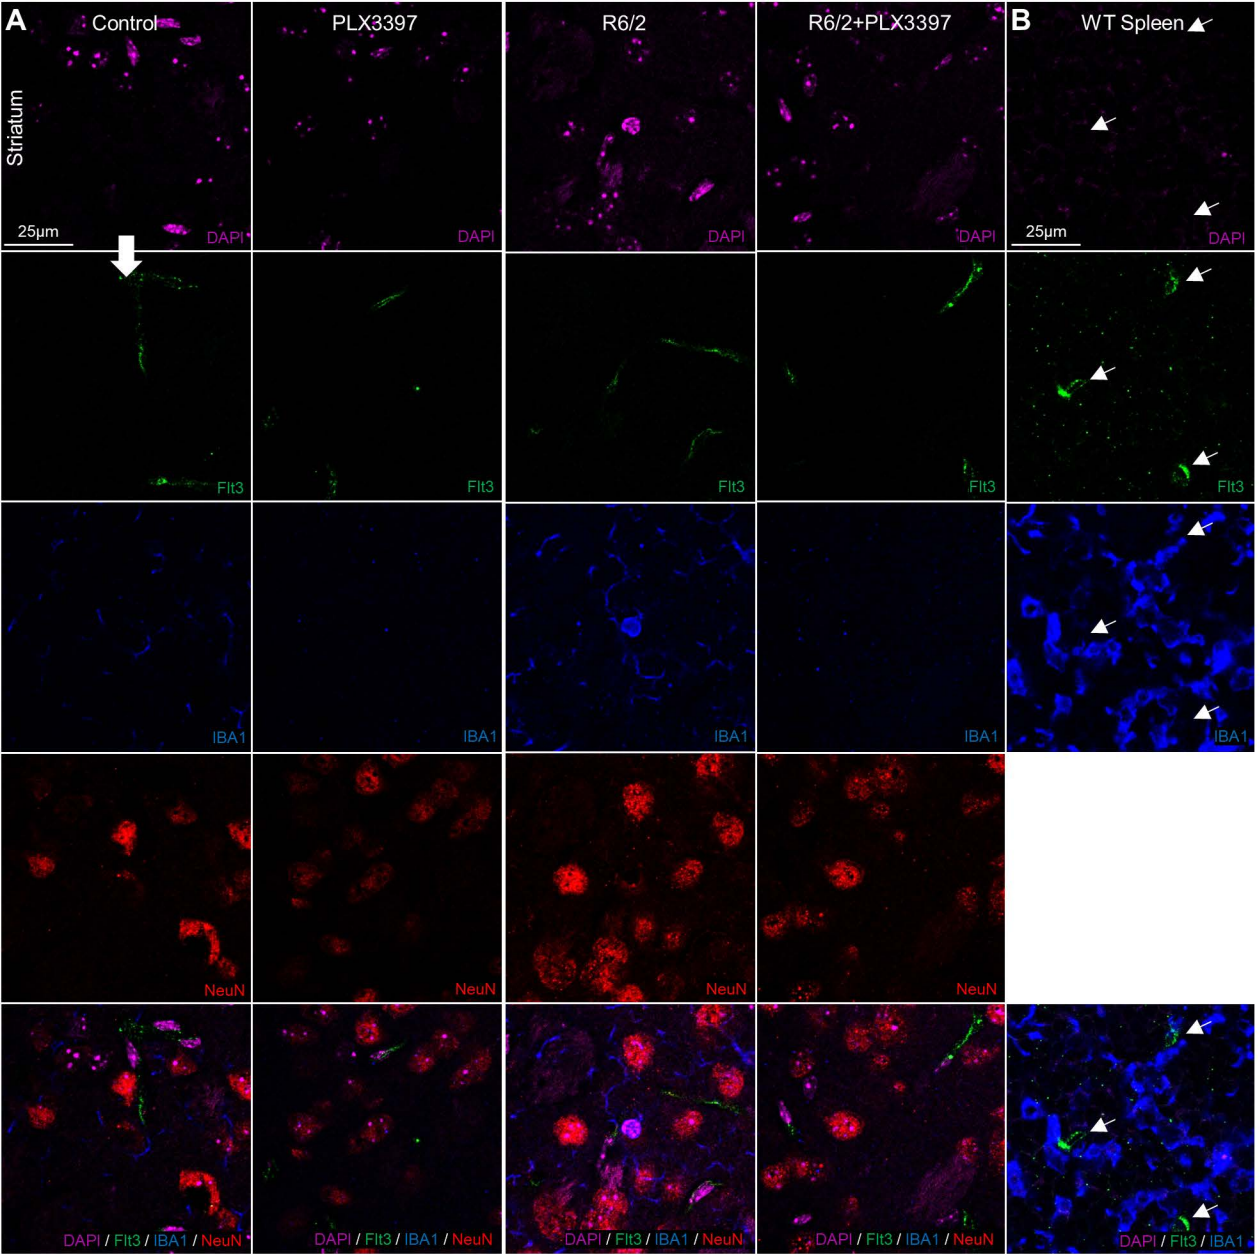

**Supplementary Figure 3. Flt3 is not expressed by neurons or microglia in R6/2 or nontransgenic brains.** **A.** Representative 63X images confirming absence of neuronal or microglial Flt3 expression in vehicle- or PLX3397-treated R6/2 or nontransgenic striatum at 11 weeks. **B.** Representative 63X images of Flt3<sup>+</sup> cells in adult wild-type spleen.

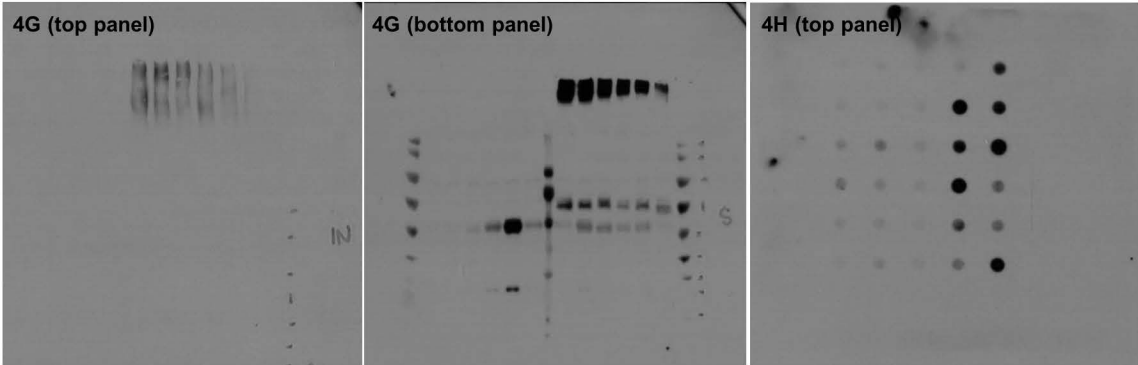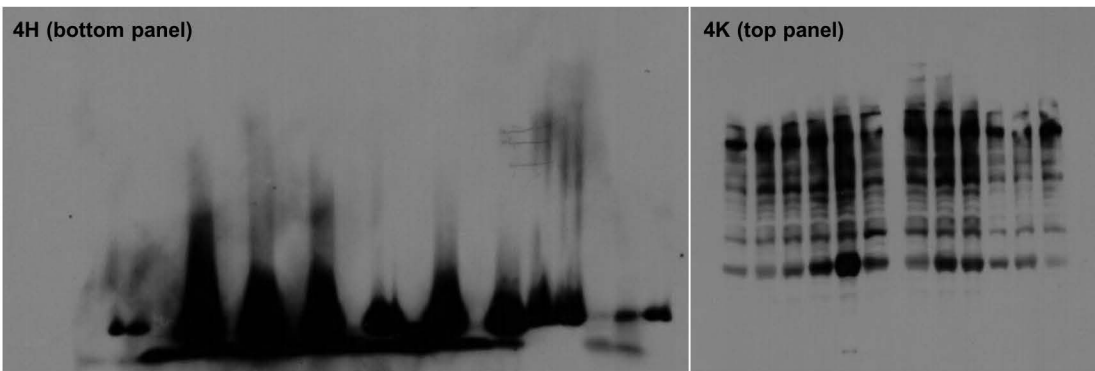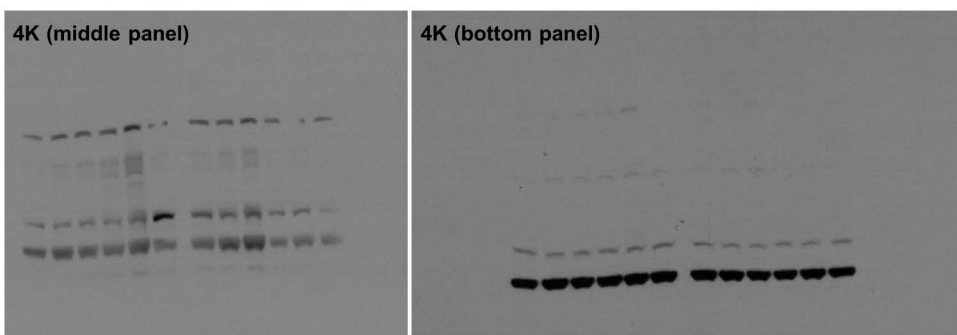

**Supplementary Fig 4: Uncropped gels**
